# Supplementary material for: Evaluation of Intratumoral Response Heterogeneity in Metastatic Colorectal Cancer and Its Impact on Patient Overall Survival: Findings from 10,551 Patients in the ARCAD Database
Source: MDPI journal article supplement (doi:10.3390/cancers15164117), 2023-08-15
Supplement: s1 [file s1]

**Table S1. Information of clinical trials included in this study**

| <b>Study</b> | <b>CT.gov Number</b> | <b>Original Manuscript Reference</b> | <b>Treatment Arm Included in Analyses</b> | <b>N Patients Included</b> |
|--------------|----------------------|--------------------------------------|-------------------------------------------|----------------------------|
| BICC-C       | NCT00101686          | Fuchs, 2007                          | CAPIRI                                    | 86                         |
|              |                      |                                      | FOLFIRI                                   | 95                         |
|              |                      |                                      | FOLFIRI + Bev                             | 43                         |
|              |                      |                                      | mIFL                                      | 95                         |
|              |                      |                                      | mIFL + Bev                                | 40                         |
| AVF2107g     | NCT00109070          | Hurwitz, 2004                        | 5FULV + Bev                               | 85                         |
|              |                      |                                      | IFL + Bev                                 | 328                        |
|              |                      |                                      | IFL + Placebo                             | 313                        |
| N016966      | NCT00069095          | Saltz, 2008                          | CAPOX                                     | 219                        |
|              |                      |                                      | CAPOX + Bev                               | 244                        |
|              |                      |                                      | CAPOX + Placebo                           | 250                        |
|              |                      |                                      | FOLFOX4                                   | 210                        |
|              |                      |                                      | FOLFOX4 + Bev                             | 256                        |
|              |                      |                                      | FOLFOX4 + Placebo                         | 259                        |
| AVF2192g     | NCT00109226          | Kabbinavar, 2005                     | 5FULV + Bev                               | 76                         |
|              |                      |                                      | 5FULV + Placebo                           | 57                         |
| N9741        | NCT00003594          | Goldberg, 2004                       | 5FU                                       | 15                         |
|              |                      | Goldberg, 2009                       | 5FU + Oxali                               | 24                         |
|              |                      |                                      | FOLFOX                                    | 178                        |
|              |                      |                                      | IFL                                       | 111                        |
|              |                      |                                      | IROX                                      | 174                        |
|              |                      |                                      | mIFL                                      | 4                          |
|              |                      |                                      | mIFL (Daily Bolus)                        | 17                         |
|              |                      |                                      | rIFL                                      | 63                         |
| PACCE (C249) | NCT00115765          | Hecht, 2009                          | FOLFIRI + Bev                             | 52                         |
|              |                      |                                      | FOLFIRI + Bev + Pan                       | 52                         |
|              |                      |                                      | FOLFOX + Bev                              | 183                        |
|              |                      |                                      | FOLFOX + Bev + Pan                        | 185                        |
| PRIME (C203) | NCT00364013          | Douillard, 2010                      | FOLFOX4                                   | 409                        |
|              |                      |                                      | FOLFOX4 + Pan                             | 399                        |
| CAIRO1       | NCT00312000          | Koopman, 2007                        | CAPIRI -> CAPOX                           | 199                        |
|              |                      |                                      | Cape -> Iri -> CAPOX                      | 203                        |
| CAIRO2       | NCT00208546          | Tol, 2009                            | CAPOX + Bev                               | 212                        |
|              |                      |                                      | CAPOX + Bev + Cet                         | 223                        |
| CRYSTAL      | NCT00154102          | Van Cutsem, 2009                     | FOLFIRI                                   | 451                        |
|              |                      | Van Cutsem, 2011                     | FOLFIRI + Cet                             | 425                        |
| Macro        | NCT00335595          | Díaz-Rubio, 2012                     | CAPOX + Bev-> Bev                         | 150                        |
|              |                      |                                      | CAPOX + Bev -> CAPOX + Bev                | 158                        |
| AGITG (MAX)  | NCT00294359          | Tebbutt, 2010                        | Cape                                      | 112                        |
|              |                      |                                      | Cape + Bev                                | 121                        |
|              |                      |                                      | Cape + Bev + Mitomycin                    | 111                        |
| GONO         | NCT01219920          | Falcone, 2007                        | FOLFIRI                                   | 16                         |
|              |                      |                                      | FOLFOXIRI                                 | 26                         |
| HORIZON II   | NCT00399035          | Hoff, 2012                           | FOLFOX/CAPOX + Cediranib 20 mg            | 408                        |
|              |                      |                                      | FOLFOX/CAPOX + Cediranib 30 mg            | 153                        |
|              |                      |                                      | FOLFOX/CAPOX + Placebo                    | 284                        |
| HORIZON III  | NCT00384176          | Schmoll, 2012                        | mFOLFOX6 + Bev                            | 540                        |
|              |                      |                                      | mFOLFOX6 + Cediranib 20mg                 | 511                        |
|              |                      |                                      | mFOLFOX6 + Cediranib 30mg                 | 147                        |
| OPUS         | NCT00125034          | Bokemeyer, 2009                      | FOLFOX                                    | 104                        |
|              |                      | Bokemeyer, 2011                      | FOLFOX + Cet                              | 116                        |

| <b>Study</b> | <b>CT.gov Number</b> | <b>Original Manuscript Reference</b> | <b>Treatment Arm Included in Analyses</b> | <b>N Patients Included</b> |
|--------------|----------------------|--------------------------------------|-------------------------------------------|----------------------------|
| CALGB-80405  | NCT00265850          | Venook, 2017                         | Chemo + Bev                               | 545                        |
|              |                      |                                      | Chemo + Bev + Cet                         | 305                        |
|              |                      |                                      | Chemo + Cet                               | 509                        |

**Table S2. Patient characteristics by whether patients were included in the analysis population**

|                                     | Analysis Population |                   |                    | P-value             |
|-------------------------------------|---------------------|-------------------|--------------------|---------------------|
|                                     | No<br>(N=6152)      | Yes<br>(N=10551)  | Total<br>(N=16703) |                     |
| <b>Age at enrollment</b>            |                     |                   |                    | <.0001 <sup>1</sup> |
| Mean (SD)                           | 60.9 (11.23)        | 59.6 (11.09)      | 60.1 (11.16)       |                     |
| Median (IQR)                        | 62.0 (54.0, 69.0)   | 60.0 (53.0, 68.0) | 61.0 (53.0, 68.0)  |                     |
| Range                               | 18.0, 90.0          | 18.0, 89.0        | 18.0, 90.0         |                     |
| <b>Gender, n (%)</b>                |                     |                   |                    | 0.2864 <sup>2</sup> |
| Female                              | 2510 (40.9%)        | 4227 (40.1%)      | 6737 (40.4%)       |                     |
| Male                                | 3626 (59.1%)        | 6323 (59.9%)      | 9949 (59.6%)       |                     |
| Missing                             | 16                  | 1                 | 17                 |                     |
| <b>Performance Score, n (%)</b>     |                     |                   |                    | 0.0013 <sup>2</sup> |
| 0                                   | 3386 (56.3%)        | 5888 (56.2%)      | 9274 (56.2%)       |                     |
| 1                                   | 2482 (41.3%)        | 4418 (42.2%)      | 6900 (41.8%)       |                     |
| 2                                   | 146 (2.4%)          | 169 (1.6%)        | 315 (1.9%)         |                     |
| 4                                   | 1 (0.0%)            | 0 (0.0%)          | 1 (0.0%)           |                     |
| Missing                             | 137                 | 76                | 213                |                     |
| <b>Regimens, n (%)</b>              |                     |                   |                    | <.0001 <sup>2</sup> |
| Chemo Alone                         | 2673 (43.4%)        | 3974 (37.7%)      | 6647 (39.8%)       |                     |
| VEGFi                               | 1983 (32.2%)        | 4363 (41.4%)      | 6346 (38.0%)       |                     |
| EGFRi                               | 824 (13.4%)         | 1449 (13.7%)      | 2273 (13.6%)       |                     |
| VEGFi & EGFRi                       | 672 (10.9%)         | 765 (7.3%)        | 1437 (8.6%)        |                     |
| <b>Liver Affected, n (%)</b>        |                     |                   |                    | <.0001 <sup>2</sup> |
| No                                  | 1303 (28.6%)        | 1444 (18.0%)      | 2747 (21.9%)       |                     |
| Yes                                 | 3247 (71.4%)        | 6563 (82.0%)      | 9810 (78.1%)       |                     |
| Missing                             | 1602                | 2544              | 4146               |                     |
| <b>Lung Affected, n (%)</b>         |                     |                   |                    | <.0001 <sup>2</sup> |
| No                                  | 3079 (68.5%)        | 4935 (61.9%)      | 8014 (64.3%)       |                     |
| Yes                                 | 1418 (31.5%)        | 3034 (38.1%)      | 4452 (35.7%)       |                     |
| Missing                             | 1655                | 2582              | 4237               |                     |
| <b>N of Metastatic Sites, n (%)</b> |                     |                   |                    | <.0001 <sup>2</sup> |
| 0                                   | 63 (1.4%)           | 31 (0.4%)         | 94 (0.7%)          |                     |
| 1                                   | 2298 (50.5%)        | 3324 (41.5%)      | 5622 (44.8%)       |                     |
| 2+                                  | 2191 (48.1%)        | 4650 (58.1%)      | 6841 (54.5%)       |                     |
| Missing                             | 1600                | 2546              | 4146               |                     |

<sup>1</sup>Wilcoxon rank-sum p-value; <sup>2</sup>Chi-Square p-value.

**Table S3. Pair-wise comparison across adjacent LBR12 level.**

| Comparisons     | Overall                  |         | Chemo-alone              |         | EGFRi                    |         | VEGFi                    |         |
|-----------------|--------------------------|---------|--------------------------|---------|--------------------------|---------|--------------------------|---------|
|                 | Hazard Ratio<br>(95% CI) | P-value |
| PL vs. SL/PL    | 1.34 (1.02, 1.75)        | 0.034   | 1.21 (0.86, 1.72)        | 0.274   | 1.45 (0.67, 3.17)        | 0.348   | 1.64 (0.94, 2.85)        | 0.081   |
| SL/PL vs. RL/PL | 1.81 (1.55, 2.10)        | <.001   | 1.67 (1.34, 2.09)        | <.001   | 1.71 (1.17, 2.50)        | 0.006   | 2.09 (1.59, 2.75)        | <.001   |
| RL/PL vs. SL    | 1.10 (0.96, 1.25)        | 0.164   | 1.07 (0.88, 1.31)        | 0.492   | 1.28 (0.92, 1.77)        | 0.143   | 1.09 (0.86, 1.37)        | 0.466   |
| SL vs. RL/SL    | 1.24 (1.17, 1.31)        | <.001   | 1.15 (1.06, 1.26)        | 0.002   | 1.32 (1.14, 1.53)        | <.001   | 1.30 (1.18, 1.43)        | <.001   |
| RL/SL vs. RL    | 1.42 (1.32, 1.53)        | <.001   | 1.45 (1.29, 1.63)        | <.001   | 1.51 (1.29, 1.75)        | <.001   | 1.35 (1.18, 1.56)        | <.001   |

LBR12, lesion-based response criteria at 12 weeks; RL, responding lesion; SL, stable lesion; PL, progressing lesion; EGFRi, epidermal growth factor receptor inhibitor; VEGFi: vascular endothelial growth factor inhibitor. Variables adjusted in models: age, gender, ECOG performance status.

**Figure S1. Patient classifications by LBR12 vs. RECIST 1.1**

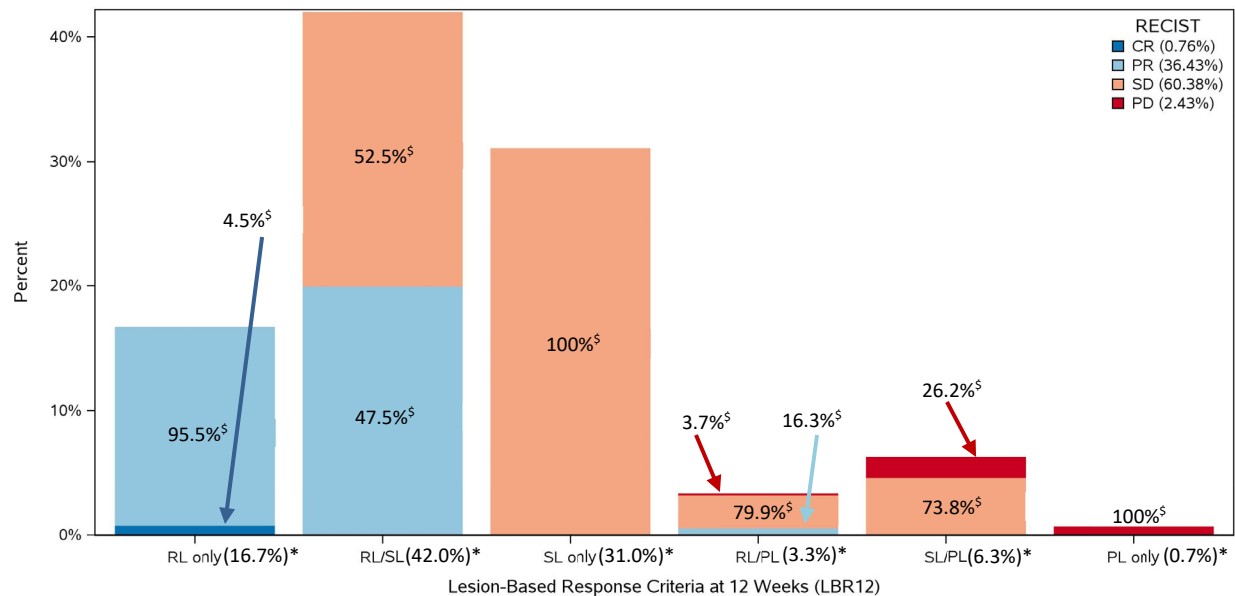

\* The percentage indicates the proportion of patients in the specific LBR12 category.

§ The percentage indicates the proportion of patients, within each LBR12 category, with specific RECIST response. LBR12, lesion-based response criteria at 12 weeks; RECIST 1.1, Response Evaluation Criteria in Solid Tumors version 1.1; RL, responding lesions; SL, stable lesions; PL, progressing lesions; CR, complete response; PR, partial response; SD, stable disease; PD, progression disease.
